# Supplementary material for: Bimetal Pd/Ni functionalized WO3 nanospheres for sensitive low-concentration hydrogen detection
Source: Royal Society of Chemistry journal article supplement (doi:10.1039/d1ce00017a), 2021-01-01
Supplement: d1ce00017a1.pdf [file d1ce00017a1.pdf]

## Supporting Information

Of

### **Bimetal Pd/Ni functionalized WO<sub>3</sub> nanospheres for sensitive low-concentration hydrogen detection**

**Beixi An<sup>1</sup>, Yibing Luo<sup>1</sup>, Jinglong Bai<sup>1</sup>, Yanrong Wang<sup>1,\*</sup>, Xu Cheng<sup>1</sup>, Jianpeng  
Li<sup>1</sup>, Qiao Wang<sup>1</sup>, Yifan Yang<sup>1</sup>, Erqing Xie<sup>1,\*</sup>**

*<sup>1</sup> School of Physical Science and Technology, Lanzhou University, 222 South Tianshui Road,  
Lanzhou, 730000, China*

---

\*Corresponding Authors.

E-mail addresses: [xieeq@lzu.edu.cn](mailto:xieeq@lzu.edu.cn) (ErqingXie); [wry@lzu.edu.cn](mailto:wry@lzu.edu.cn) (Yanrong Wang)

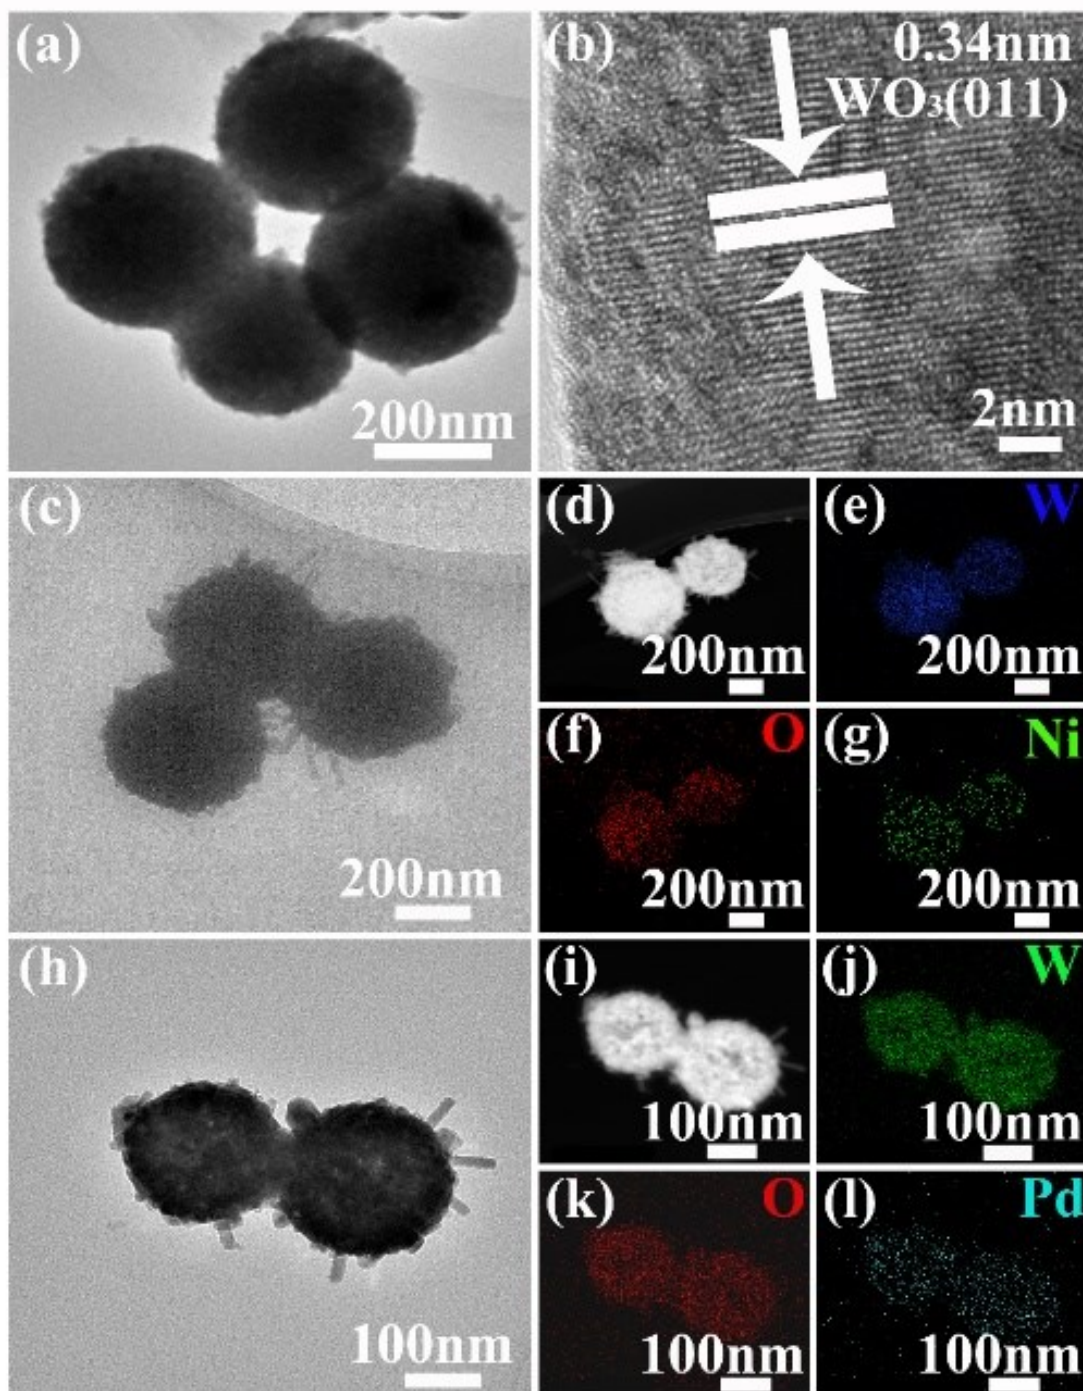

**Figure S1** (a, c and h) The transmission electron micrographs of  $\text{WO}_3$ ,  $\text{Ni-WO}_3$  and  $\text{Pd-WO}_3$  (b) The HRTEM of  $\text{WO}_3$ , (d)-(g) The element distribution of  $\text{Ni-WO}_3$ , (i)-(l) The element distribution of  $\text{Pd-WO}_3$ .

TEM images of as prepared samples are shown in **Fig S1**. The pure  $\text{WO}_3$  nanospheres have a smooth surface (**Fig S1a**) and the diameter between 400 and 500

nm. The Ni-WO<sub>3</sub> nanospheres are given in **Fig S1c**. The surface of the nanospheres is no longer smooth, with diameter ranging from 300 to 500 nm. **Fig S1h** show the TEM image of Pd-WO<sub>3</sub> nanospheres. Pd-WO<sub>3</sub> nanospheres are about 500 nm in diameter. It is obvious that the surface of nanospheres with Ni or Pd is coarser than that of pure WO<sub>3</sub> nanospheres. To achieve more detailed structure information, the HRTEM observations were further employed. **Fig S1d-g** shows the uniformly distribution of W, O, Ni on the surface of Ni-WO<sub>3</sub> nanospheres, respectively. **Fig S1 i-l** shows the uniformly distribution of W, O, Pd on the surface of Pd-WO<sub>3</sub> nanospheres. As shown in **Fig S1b**, the measured d spacings of the nanospheres were 0.34 nm, corresponding to WO<sub>3</sub> (011).

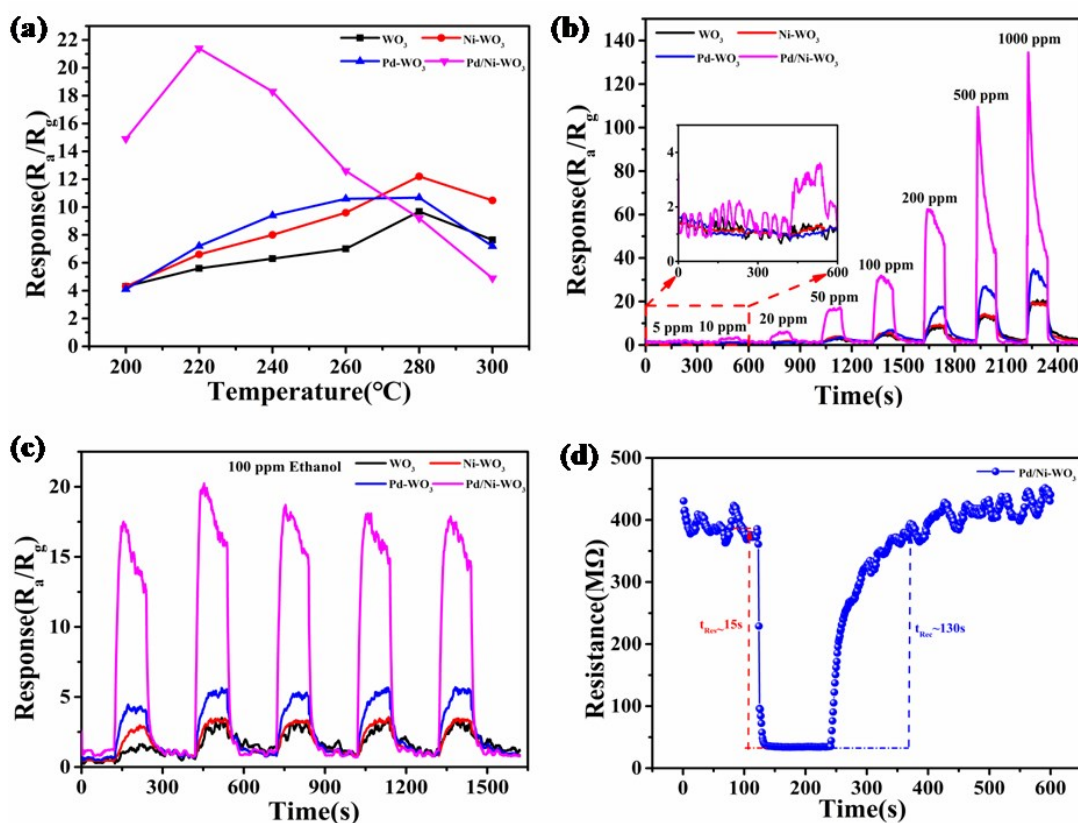

**Figure S2** (a) The response of sensors versus operating temperature ranging from 200-300 $^{\circ}\text{C}$  to 100 ppm Ethanol. (b) The change in response of sensors under exposure to

Ethanol with varying concentration from 5-1000 ppm. (c) The repeatability of sensors to 100 ppm Ethanol. (d) The resistance of Pd/Ni-WO<sub>3</sub> devices varies with time to 100 ppm Ethanol.

Firstly, the optimum working temperature of four samples was tested (as shown in **Fig S2a**). As shown in hydrogen, the response of the pristine WO<sub>3</sub>, Ni-WO<sub>3</sub>, Pd-WO<sub>3</sub> and Pd/Ni-WO<sub>3</sub> samples to 100 ppm Ethanol increased with the increase of temperature, then reached the highest point, and then decreased. At 280°C, WO<sub>3</sub>, Ni-WO<sub>3</sub> and Pd-WO<sub>3</sub> nanospheres showed higher response of 9, 12 and 10.5 respectively. The response of Pd/Ni-WO<sub>3</sub> sensor to 100 ppm Ethanol at 220°C can reach 21 compared with bare WO<sub>3</sub>, Ni-WO<sub>3</sub>, and Pd-WO<sub>3</sub>, the optimum operating temperatures of Pd/Ni-WO<sub>3</sub> sensors decreased 70°C. The response-recovery curves of the pristine WO<sub>3</sub>, Ni-WO<sub>3</sub>, Pd-WO<sub>3</sub>, and Pd/Ni-WO<sub>3</sub> to Ethanol with various concentrations at respective optimal operating temperature are also measured (as shown in **Fig S2b**). The Pd/Ni-WO<sub>3</sub> exhibits largest enhancement in the resistance change at lower operating temperature of 220°C, indicating the response of pristine WO<sub>3</sub> to Ethanol has also been significantly improved by bimetallic Pd/Ni decoration. The cycling stability and reproducibility of this sensor was also investigated (as shown in **Fig S2c**). As a result, the Pd/Ni-WO<sub>3</sub> sensor showed an almost identical response towards Ethanol, indicating a good repeatability. As shown in **Fig S2d**, the sensor based on Pd/Ni-WO<sub>3</sub> shows the optimal response and recovery times compare to the other samples. However, it can be clearly seen that the response becomes favorable when WO<sub>3</sub> nanospheres are doped with mono Ni or Pd or double metal. It can be seen that the Pd/Ni-WO<sub>3</sub> exhibit faster response and recovery speeds than other sensors, but to a high concentration of

ethanol gas sensor's response dropped, the detailed mechanism discussed in the gas mechanism section.

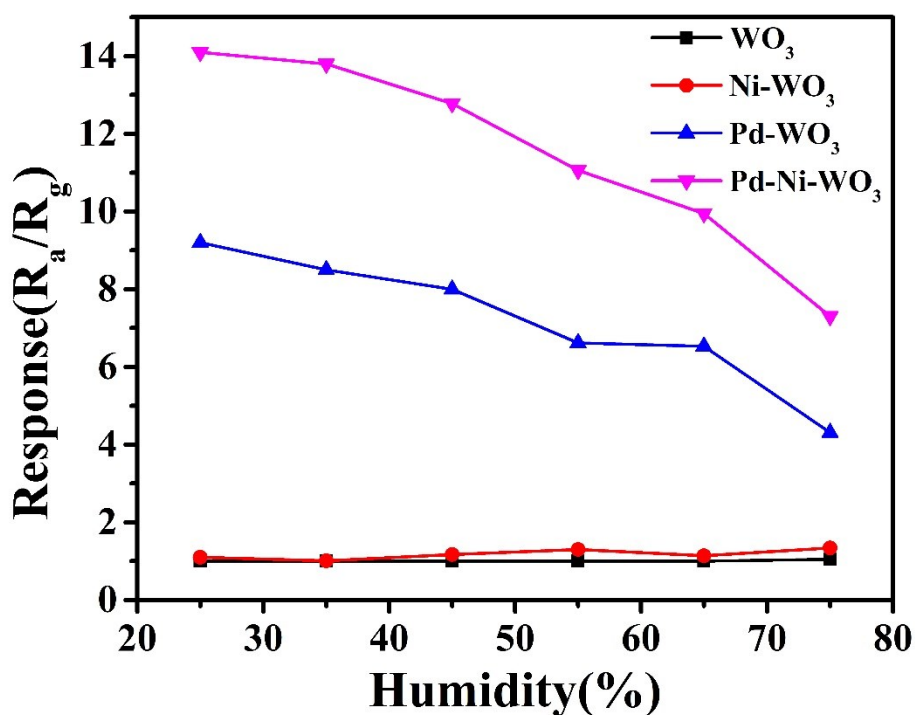

**Figure S3** the response of the sensors test in different humidity

Clearly, the sensor response decreased as the relative humidity increased from 25% to 75% as observed in **Fig S3**. Such influence of the water vapor on the response of the metal oxide-based sensors has been reported in literature.

| Concentration(ppb)    | 1    | 5    | 10   | 50   | 100  | 500  | 1000  | 2000  |
|-----------------------|------|------|------|------|------|------|-------|-------|
| WO <sub>3</sub>       | 1.08 | 1.11 | 1.44 | 1.69 | 1.70 | 2.24 | 2.93  | 3.48  |
| Ni-WO <sub>3</sub>    | 1.15 | 1.11 | 1.18 | 1.07 | 1.12 | 1.09 | 1.16  | 1.13  |
| Pd-WO <sub>3</sub>    | 1.01 | 1.01 | 1.03 | 1.13 | 1.33 | 2.72 | 6.90  | 18.53 |
| Pd/Ni-WO <sub>3</sub> | 1.25 | 1.43 | 1.96 | 2.40 | 3.45 | 7.47 | 14.30 | 26.64 |

**Table R1** the response value of the sensor to different concentrations of hydrogen

The response value of the sensor to different concentrations of hydrogen is shown in **Table R1**. It is clearly shown that the H<sub>2</sub>-sensing response is strongly enhanced by the bimetallic functionalization.
